# Supplementary material
Source: ML conference proceedings conference paper supplement (https://openaccess.thecvf.com/content/CVPR_2020/html/Shridhar_ALFRED_A_Benchmark_CVPR_2020_paper.html)
Supplement: Supplementary file 3 [file Shridhar_ALFRED_A_Benchmark_CVPR_2020_supplemental.zip]

Archive with 4 entries (4 files):
- 04325-supp.pdf
- __MACOSX/._04325-supp.pdf
- 04325-video.mp4
- __MACOSX/._04325-video.mp4
